# Supplementary material
Source: Royal Society of Chemistry journal article supplement (doi:10.1039/d6lf00036c)
Supplement: d6lf00036c1.pdf [file d6lf00036c1.pdf]

## Interfacial Control as a Strategy for Advanced Catalyst Layer Architectures in PEMFCs

Emanuele Magliocca<sup>a</sup>, Shangwei Zhou<sup>a</sup>, Dan J. L. Brett<sup>b</sup>, and Thomas S. Miller<sup>a,c\*</sup>

<sup>a</sup> Electrochemical Innovation Lab, Department of Chemical Engineering, University College London, London WC1E 7JE, United Kingdom.

<sup>b</sup> Prosemino Limited, The Paper Yard, Canada Water, London, SE16 7LG, UK

<sup>c</sup> Advanced Propulsion Lab, UCL East Marshgate, 7 Sidings Street, Stratford, London, E20 2AE UK

### Electronic Supplementary Information

**Table S1.** Cell and dew point temperatures for different relative humidities.

|                        | 100%RH | 60%RH | 20%RH |
|------------------------|--------|-------|-------|
| Cell Temperature (°C)  | 80     | 80    | 80    |
| Cathode dew point (°C) | 80     | 67.9  | 44.8  |
| Anode dew point (°C)   | 80     | 67.9  | 44.8  |

## S1 XRF measurements.

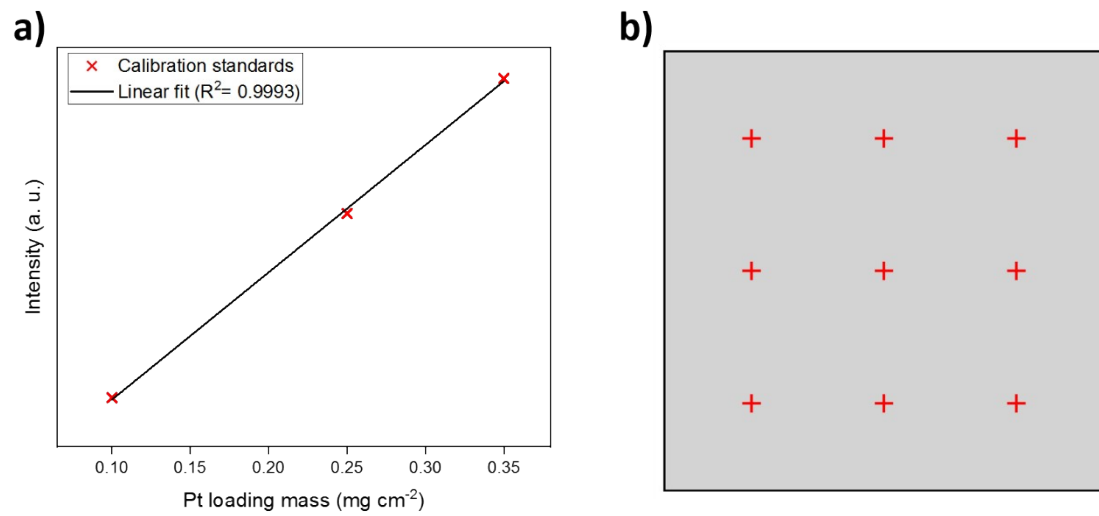

**Figure S1.** **a)** Example of a calibration curve using a three-point method; **b)** Top view of a  $5 \times 5 \text{ cm}^2$  GDE showing the nine XRF acquisition points across the active area.

**Table S2.** XRF measurements for three different batches of GDEs.

| <b>Batch</b> | <b>GR1 (mg<sub>Pt</sub> cm<sup>-2</sup>)</b> | <b>GR2 (mg<sub>Pt</sub> cm<sup>-2</sup>)</b> | <b>GR3 (mg<sub>Pt</sub> cm<sup>-2</sup>)</b> |
|--------------|----------------------------------------------|----------------------------------------------|----------------------------------------------|
| 1            | 0.30 ± 0.01                                  | 0.29 ± 0.01                                  | 0.31 ± 0.02                                  |
| 2            | 0.31 ± 0.01                                  | 0.30 ± 0.01                                  | 0.29 ± 0.01                                  |
| 3            | 0.30 ± 0.02                                  | 0.30 ± 0.01                                  | 0.31 ± 0.01                                  |

S2 GR samples SEM images at lower magnification.

**GR1**

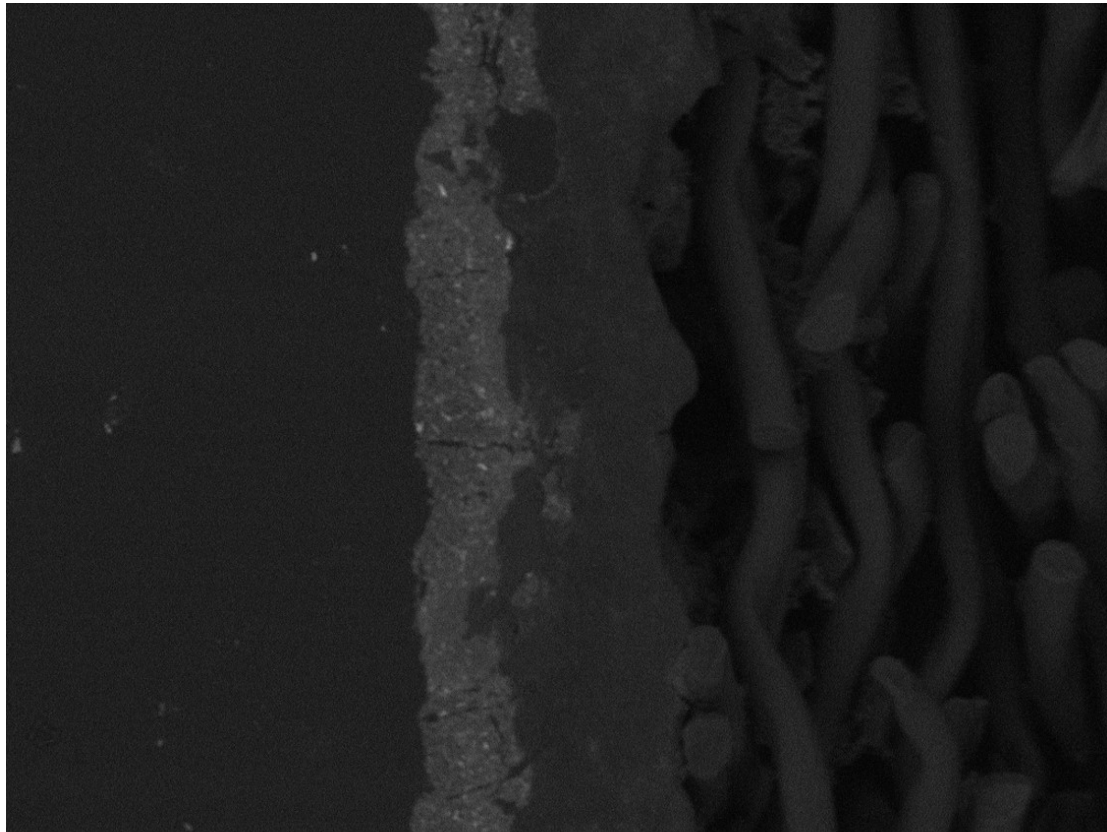

50 $\mu$ m

GR2

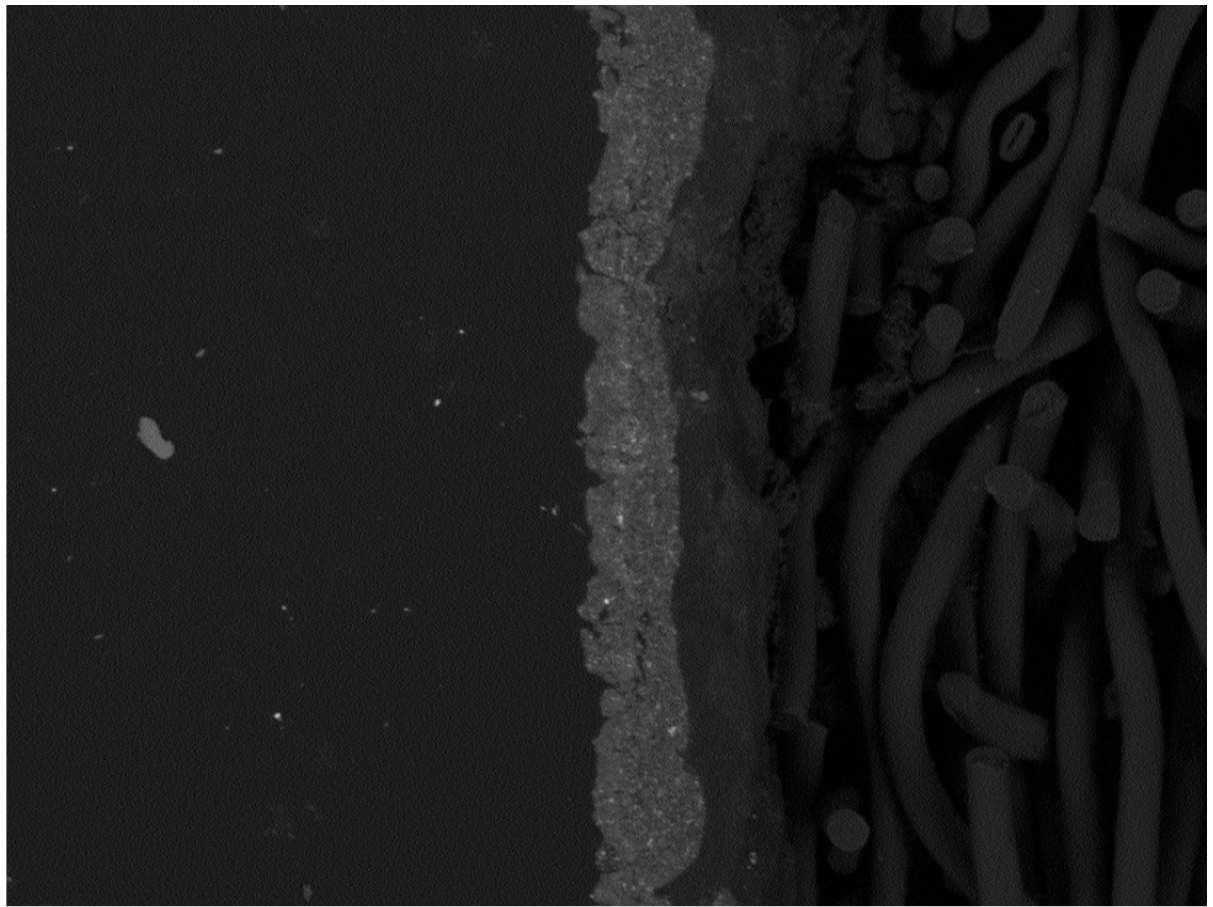

50µm

**GR3**

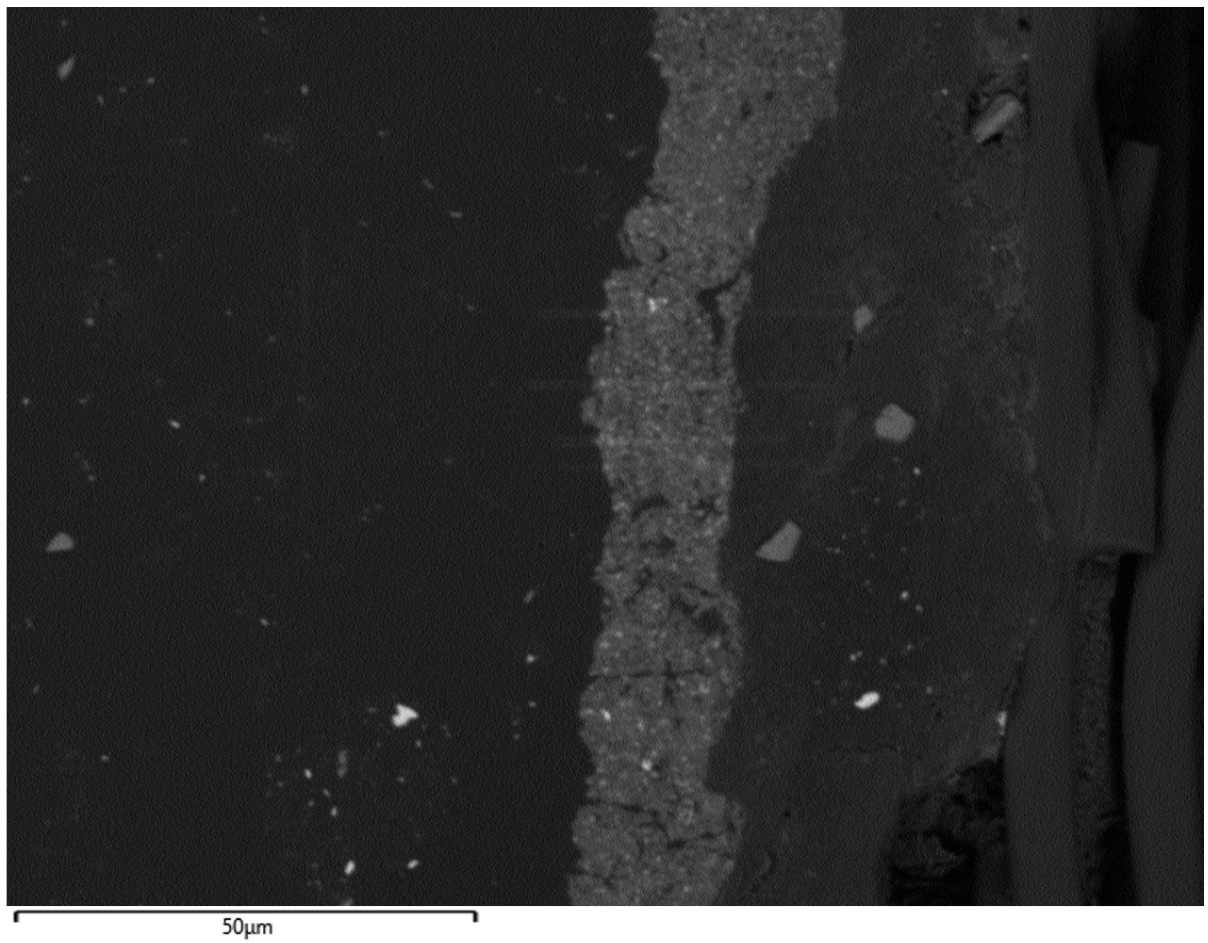

**Figure S2.** Lower magnification SEM images for samples GR1, GR2 and GR3.

### S3 ECSA profiles for GR1, GR2, GR3, GD4 during the ADT.

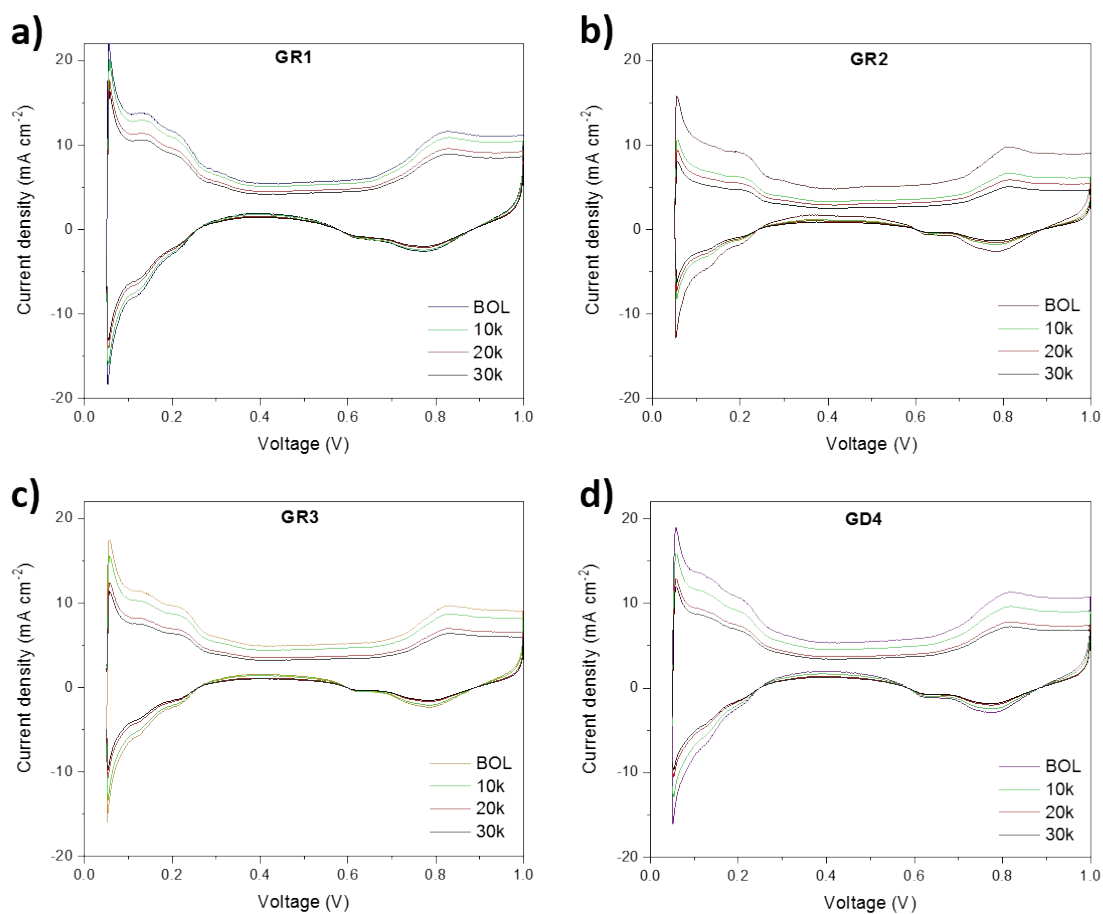

**Figure S3.** ECSA characterizations for 25 cm<sup>2</sup> single PEMFC, H<sub>2</sub>/N<sub>2</sub> 0.2 L min<sup>-1</sup>, 80°C, zero back-pressure. CVs profiles acquired, between 0.05 – 1 V with 20 mV s<sup>-1</sup> scan rate, during the AST for samples: a) GR1, b) GR2, c) GR3, and d) GD4.
